# Supplementary material for: Challenging the notion of Aedes aegypti as the primary chikungunya virus vector: insights from Kédougou, Southeastern Senegal
Source: Research Square preprint supplement (doi:10.21203/rs.3.rs-6865029/v1), 2025-07-01
Supplement: Supplementary file 1 [file f7a89847a20d42d5636753dd.docx]

**Additional File**. Breeding preferences and epidemics risk indices from villages of chikungunya human cases

| Villages | Container type | Container inspected (X%) * | Positives container (Y%) ψ | Breeding Preference (Y%/X%) | Breteau Index | Container Index |
| --- | --- | --- | --- | --- | --- | --- |
| Badioula | Clay jars | 11 (19.64) | 1 (16.67) | 0.85 | 25 | 10.71 |
| Water storage containers | 19 (33.93) | 0 | 0 |
| Tires | 6 (10.71) | 1 (16.67) | 1.56 |
| Bricks | 14 (25) | 3 (50) | 2 |
| **Animal watering** | 1 (1.79) | 1 (16.67) | **9.33** |
| Abandoned containers | 5 (8.93) | 0 | 0 |
| TOTAL | 56 | 6 |  |
| Fodé Binia | Clay jars | 16 (21.33) | 2 (10.53) | 0.49 | 38.78 | 25.33 |
| Water storage containers | 20 (26.67) | 0 | 0 |
| **Tree holes** | 2 (2.67) | 2 (10.53) | **3.95** |
| Abandoned containers | 24 (32) | 9 (47.37) | 1.48 |
| Tires | 11 (14.67) | 4 (21.05) | 1.44 |
| **Bricks** | 1 (1.33) | 1 (5.26) | **3.95** |
| **Animal watering** | 1 (1.33) | 1 (5.26) | **3.95** |
| TOTAL | 75 | 19 |  |
| Faraba | Clay jars | 25 (22.73) | 1 (5) | 0.22 | 21.51 | 18.18 |
| Water storage containers | 27 (24.55) | 0 | 0 |
| Tires | 23 (20.91) | 7 (35) | 1.67 |
| Abandoned containers | 25 (22.73) | 5 (25) | 1.1 |
| **Animal watering** | 4 (3.64) | 3 (15) | **4.13** |
| Bricks | 6 (5.45) | 4 (20) | 3.67 |
| TOTAL | 110 | 20 |  |
| Bembou | Clay jars | 13 (18.57) | 1 (5.88) | 0.32 | 62.96 | 24.29 |
| Water storage containers | 29 (41.43) | 4 (23.53) | 0.57 |
| Abandoned containers | 19 (27.14) | 7 (41.18) | 1.52 |
| Tires | 8 (11.43) | 4 (23.53) | 2.06 |
| **Animal watering** | 1 (1.43) | 1 (5.88) | **4.12** |
| TOTAL | 70 | 17 |  |
| Lafia | **Water storage containers** | 8 (14.29) | 2 (33.33) | **2.33** | 60 | 10.71 |
| Abandoned containers | 45 (80.36) | 4 (66.67) | 0.83 |
| Tires | 3 (5.36) | 0 | 0 |
| TOTAL | 56 | 6 |  |
| Kolia | Clay jars | 6 (6.19) | 1 (2.78) | 0.45 | 39.13 | 37.11 |
| Water storage containers | 39 (40.21) | 4 (11.11) | 0.28 |
| Abandoned containers | 44 (45.36) | 25 (69.44) | 1.53 |
| Tires | 4 (4.12) | 3 (8.33) | 2.02 |
| **Animal watering** | 2 (2.06) | 2 (5.56) | **2.69** |
| Basins | 2 (2.06) | 1 (2.78) | 1.35 |
| TOTAL | 97 | 36 |  |
| Kondokho | Clay jars | 14 (10.07) | 0 | 0 | 164.81 | 64.03 |
| Water storage containers | 10 (7.19) | 1 (1.12) | 0.16 |
| Tires | 7 (5.04) | 5 (5.62) | 1.12 |
| **Bricks** | 85 (61.15) | 80 (89.89) | **1.47** |
| Abandoned containers | 19 (13.67) | 2 (2.25) | 0.16 |
| Animal watering | 4 (2.88) | 1 (1.12) | 0.39 |
| TOTAL | 139 | 89 |  |
| Laminya | Clay jars | 6 (24) | 0 | 0 | 32.35 | 44 |
| Water storage containers | 9 (36) | 1 (9.09) | 0.25 |
| **Animal watering** | 1 (4) | 1 (9.09) | **2.27** |
| **Tires** | 1 (4) | 1 (9.09) | **2.27** |
| **Abandoned containers** | 8 (32) | 8 (72.73) | **2.27** |
| TOTAL | 25 | 11 |  |
| Boundoucondi | Clay jars | 12 (25.53) | 2 (12.5) | 0.49 | 51.61 | 34.04 |
| Water storage containers | 7 (14.89) | 0 | 0 |
| **Animal watering** | 3 (6.38) | 3 (18.75) | **2.94** |
| Abandoned containers | 13 (27.66) | 4 (25) | 0.90 |
| Tires | 12 (25.53) | 7 (43.75) | 1.71 |
| TOTAL | 47 | 16 |  |
| Ibel | **Clay jars** | 8 (72.73) | 1 (100) | **1.38** | 5.56 | 9.09 |
| Water storage containers | 2 (18.18) | 0 | 0 |
| Tires | 1 (9.09) | 0 | 0 |
| TOTAL | 11 | 1 |  |
| Nathia | **Water storage containers** | 1 (14.29) | 1 (20) | **1.4** | 100 | 100 |
| **Animal watering** | 1 (14.29) | 1 (20) | **1.4** |
| Abandoned containers | 5 (71.43) | 3 (60) | 0.84 |
| TOTAL | 7 | 5 |  |
| Badian | Clay jars | 6 (13.95) | 1 (2.94) | 0,21 | 100 | 100 |
| Water storage containers | 7 (16.28) | 3 (8.82) | 0.54 |
| **Animal watering** | 1 (2.33) | 1 (2.94) | **1.26** |
| **Bricks** | 29 (67.44) | 29 (85.29) | **1**.**26** |
| TOTAL | 43 | 34 |  |

***** X% = Container inspected /Total examined

**ψ** Y% = Positive container /Total Positives
